# Supplementary material for: Impaired Cx43 gap junction endocytosis causes morphological and functional defects in zebrafish
Source: PubMed Central journal article supplement — Mol Biol Cell. 2021 Oct 1;32(20):ar13. doi: 10.1091/mbc.E20-12-0797 (PMC8684743; doi:10.1091/mbc.e20-12-0797), 2021-10-01
Supplement: mbc-32-ar13-s002.pdf [file mbc-32-ar13-s002.pdf]

# Impaired Cx43 gap junction endocytosis causes morphological and functional defects in zebrafish

Caitlin Hyland, Michael Mfarej, Giorgos Hiotis, Sabrina Lancaster, Noelle Novak, Mary Kathryn Iovine, and Matthias Falk

*Corresponding author(s): Matthias Falk, Lehigh University*

---

## Review Timeline:

|                     |            |
|---------------------|------------|
| Submission Date:    | 2020-12-29 |
| Editorial Decision: | 2021-03-23 |
| Revision Received:  | 2021-07-07 |
| Editorial Decision: | 2021-07-08 |
| Revision Received:  | 2021-07-26 |
| Accepted:           | 2021-07-27 |

---

*Editor-in-Chief: Matthew Welch*

## Transaction Report:

(Note: With the exception of the correction of typographical or spelling errors that could be a source of ambiguity, letters and reports are not edited. The original formatting of letters and referee reports may not be reflected in this compilation.)

RE: Manuscript #E20-12-0797

TITLE: Impaired Cx43 gap junction endocytosis causes cardiovascular defects in zebrafish

Dear Dr. Falk,

First, please accept my apologies for the delay in responding.

Second, two reviewers have given your manuscript a careful reading. Both find your work potentially valuable and appropriate for Molecular Biology of the Cell. After sifting through their comments, I feel that the requested revisions are sufficiently significant that your manuscript will require re-review.

Both Reviewers 1 and 2 mention the need for better vetting of your deletion. Reviewer 1 notes that there are significant concerns about the Cx43 (256-289) deletion in terms of controlling for off-target effects. Reviewer 1 is unclear (at least to me) about where the issue related to cultured cells or fish, or both, but this is an issue that you should address. Reviewer 2 is more explicit regarding the fish work and the need for additional evidence that your interpretation of what you believe you have done in generating the deletion line is correct.

Reviewer 2 also has concerns about interpretation of your results, given the increase in mRNA in the mutant Cx43 line and the relevance of increased protein levels given that transcriptional backdrop. While your interpretation about endocytosis may account for the data, dealing with alternative hypotheses that are less interesting seems important. Reviewer 1 hints that additional experimental support in this area would also improve the paper.

In addition to these issues, in your Response to Reviewers, please respond to each of the points the Reviewers raise regarding data analysis and other specific concerns.

Thanks for submitting your work to MBOC. Again, my apologies for the delay.

Best regards,  
Jeff Hardin  
Monitoring Editor

Molecular Biology of the Cell

-----  
Dear Prof. Falk,

The review of your manuscript, referenced above, is now complete. The Monitoring Editor has decided that your manuscript is not acceptable for publication at this time, but may be deemed acceptable after specific revisions are made, as described in the Monitoring Editor's decision letter above and the reviewer comments below.

A reminder: Please do not contact the Monitoring Editor directly regarding your manuscript. If you have any questions regarding the review process or the decision, please contact the MBOC Editorial Office ([mboc@ascb.org](mailto:mboc@ascb.org)).

When submitting your revision include a rebuttal letter that details, point-by-point, how the Monitoring Editor's and reviewers' comments have been addressed. (The file type for this letter must be "rebuttal letter"; do not include your response to the Monitoring Editor and reviewers in a "cover letter.") Please bear in mind that your rebuttal letter will be published with your paper if it is accepted, unless you have opted out of publishing the review history.

Authors are allowed 180 days to submit a revision. If this time period is inadequate, please contact us at [mboc@ascb.org](mailto:mboc@ascb.org).

Revised manuscripts are assigned to the original Monitoring Editor whenever possible. However, special circumstances may preclude this. Also, revised manuscripts are often sent out for re-review, usually to the original reviewers when possible. The Monitoring Editor may solicit additional reviews if it is deemed necessary to render a completely informed decision.

In preparing your revised manuscript, please follow the instruction in the Information for Authors ([www.molbiolcell.org/info-for-authors](http://www.molbiolcell.org/info-for-authors)). In particular, to prepare for the possible acceptance of your revised manuscript, submit final, publication-quality figures with your revision as described.

To submit the rebuttal letter, revised manuscript, and figures, use this link: [Link Not Available](#)

Please contact us with any questions at [mboc@ascb.org](mailto:mboc@ascb.org).

Thank you for submitting your manuscript to Molecular Biology of the Cell. We look forward to receiving your revised paper.

Sincerely,

Eric Baker  
Journal Production Manager  
MBoC Editorial Office  
[mbc@ascb.org](mailto:mbc@ascb.org)

-----  
Reviewer #1 (Remarks to the Author):

The authors provide results on the disruptive effects of a mutant Cx43 (Cx43 $\Delta$ 256-289) on gap junction endocytosis and communication in cultured cells and in a zebrafish model in vivo - particularly on cardiac GJ function and morphology. The strengths of the article include its novel insights into the process of Cx43 endocytosis using these in vitro and in vivo models, as well novel information on how Cx43-associated cardiovascular abnormalities may occur. Most, if not all, of the observations made were reasonably supported by experimentation and quantified data. Many effect sizes did not appear to be large, but there was sufficient replication to achieve significance in most cases. The paper is clearly written and the study appears to well performed.

Specific comments:

No control was used to account for the potential off-target effects of the Cx43 (256-289) deletion process. The WT groups may not serve as adequate controls in this respect. The authors should note this and other limitations of approach and on interpretation in the discussion.

The differential/inconsistent effects on vessel diameter in the fin vs embryo should be discussed/addressed further.

The method for measurement of edema in Figure 5C appears to be missing.

Mechanistic insight into the link between impaired Cx43 endocytosis and cardiovascular deficits was largely restricted to the discussion section. It might have been useful to further explore mechanism with further experiments in the results section. Are there additional data lately generated by the authors that might unify the mechanistic basis of their story?

Minor comments:

Lines 61-65 should perhaps to be re-written to improve clarity.

Line 75: This sentence might need re-writing to improve precision.

Line 136: Half-life

Figure 7C : Missing errors bars

Reviewer #2 (Remarks to the Author):

This is an interesting study by Hyland et al that reports the phenotypic characterization of some cardiovascular defects when a region of the Cx43 c-terminus is deleted. The description of the cardiac and vascular defects in the mutant zebrafish line is straightforward and clear. Less supported is the genetic characterization of the zebrafish line, or the association with impaired endocytosis. Given that there is an increase in Cx43 mRNA in the mutant fish line which matches the reported increase in protein levels, the findings may quantitatively be due more to transcriptional and translational regulation than post-translation events.

1. It is not clear what is meant by the zebrafish "transgenic line". The methods describe a targeted deletion of the Cx43 c-terminus, yet no sequencing is provided to confirm deletion. Please provide the original sequencing data to confirm deletion and also the strategies employed to minimize off target effects such as backcrossing.
2. For the zebrafish models, please provide biochemical support of the immunohistochemistry data, confirming altered protein levels.
3. Why is mutant Cx43 mRNA increased 1.5 fold (Figure 8)?

4. A 50% increase in Cx43 mRNA could very likely result in a 50% increase in mutant Cx43 protein levels. Total Cx43 protein levels also increased 50% compared to wildtype fish (Figures 2 and 3). Thus increased Cx43 protein levels would simply result from increases in transcription and translation, and not impaired endocytosis. Outside of the author's prior publications, what are the data in the current models that endocytosis is impaired leading to an increase in Cx43 levels?
5. What is the endogenous levels of zebrafish atrial and ventricular Cx43 relative to other connexin proteins? It is highly unusual to see significant atrial expression of Cx43, approaching that of ventricular expression.
6. Patch clamping pairs of cells containing WT and mutant Cx43 will help establish and quantify increased intercellular conductance relative to increase plaque density.
7. The authors previously used Gap27 to inhibit gap junction formation and GJIC, and reverse mutant induced zebrafish phenotypes (Bhattacharya et al, 2020). A similar cardiovascular rescue in this study would considerably strengthen the results.



## Point-by-point response to Manuscript #E20-12-0797:

We thank the reviewers and the Monitoring Editor for their verbatim criticism and the time they invested to carefully evaluate our manuscript. We are pleased, that both reviewers found our study to be important and interesting. We have addressed all concerns as detailed below. In response to the critique, four main changes have been introduced to the revised manuscript:

(1) In response to the critique, we repeated qRT-PCR analyses, this time by pooling 15 embryos per biological replicate instead of using just one embryo as done in the previous analyses. We are aware that the previous analysis was not optimal as phenotype severity is quite heterogeneous and thus individual embryos may not represent the average, however at that time, we did not have enough homozygote mutant embryos to perform a large enough study. Importantly, this modification now shows that mRNA levels of *cx43* in the mutant are not increased, and indeed are essentially identical to WT. Thus, the observed increase in Cx43 protein and gap junction levels is not due to upregulated *cx43* expression, but impaired gap junction turnover. Indeed, with this new data fueling stronger confidence, we now express clearer that impaired gap junction turnover causes all sorts of problems, as demonstrated in detail here for vasculature morphology and function.

(2) We also performed experiments using the gap junction blocker, Gap27 as has been done earlier (Bhattacharya et al., 2020) and suggested by reviewer 2; and indeed we could rescue the bradycardia (abnormally slow heartbeat rate), but not the heart malformation phenotype, suggesting that both, increased GJIC resulting from overall increased gap junction size and number, as well as cell migration issues, both caused by disturbed endocytosis significantly contribute to the observed phenotypes.

(3) As suggested by reviewer 2, we added Western blot-based Cx43 protein expression data in addition to the immunofluorescence data shown previously (revised Figure 2).

(4) Finally, we present in much more detail how the *cx43<sup>h10</sup>* mutant zebrafish line was generated, what we did to prevent off-target side effects, and show verification of the mutant via DNA sequencing data as suggested by Reviewer 2 (Supplemental Table 1, and Supplemental Figures 1, 2).

Edits have been performed throughout the manuscript and major changes, including in response to reviewer critique, have been **highlighted in yellow**. Our substantial additions and revisions certainly have generated a much-improved manuscript that much better supports our important novel finding that regulated gap junction turnover is essential for gap junction function; and we hope our revised manuscript is now suitable for publication in *MBoC*. Please see detailed responses below:

### Reviewer #1 (Remarks to the Author):

*The authors provide results on the disruptive effects of a mutant Cx43 (Cx43 $\Delta$ 256-289) on gap junction endocytosis and communication in cultured cells and in a zebrafish model in vivo - particularly on cardiac GJ function and morphology. The strengths of the article include its novel insights into the process of Cx43 endocytosis using these in vitro and in vivo models, as well [as] novel information on how Cx43-associated cardiovascular abnormalities may occur. Most, if not all, of the observations made were reasonably supported by experimentation and quantified data. Many effect sizes did not appear to be large, but there was sufficient replication to achieve significance in most cases. The paper is clearly written, and the study appears to [be] well performed.*

We thank the reviewer for this positive feedback.

*Specific comments:*

*No control was used to account for the potential off-target effects of the Cx43 (256-289) deletion process. The WT groups may not serve as adequate controls in this respect. The authors should note this and other limitations of approach and on interpretation in the discussion.*

We now describe in much more detail how the  $\Delta$ 256-289 deletion in zebrafish was generated using CRISPR/Cas9 gene editing technology and describe in detail how gRNAs were designed, and their specificity ensured (Materials and Methods, p. 23/24; Results, p. 6ff, Figure 1, and Supplemental Figures 1, 2). We are aware of potential off-target effects of this technology, however, (1) we obtained the “expected” effects (vasculature and other organs where Cx43 function is known to be important), (2) gRNAs are predicted to bind in addition to *cx43* only to *cx40.8*, and not to any other sites, even when 3 mismatches are allowed; (3) we used improved VP12 Cas9; and backcrossing to eliminate mosaic mutagenesis and to generate homozygotes should have eliminated other potential off-targets. This is now discussed in detail on p. 6 and 17.

*The differential/inconsistent effects on vessel diameter in the fin vs embryo should be discussed/addressed further.*

We do not see an inconsistency in vessel diameter between embryos and adult fins, as angiogenic vessels, we analyzed in embryos are not yet fully differentiated into veins and arteries. Larger vessel diameters were observed in both, embryos, and adults. To clarify, this section has been rewritten and additional detailed information provided (p. 13).

*The method for measurement of edema in Figure 5C appears to be missing.*

The missing method has been added (p. 30).

*Mechanistic insight into the link between impaired Cx43 endocytosis and cardiovascular deficits was largely restricted to the discussion section. It might have been useful to further explore the mechanism with further experiments in the results section. Are there additional data lately generated by the authors that might unify the mechanistic basis of their story?*

Links between impaired Cx43 endocytosis and cardiovascular and other defects have been added throughout the manuscript. Most importantly, our improved qRT-PCR

analysis now shows that mRNA levels of mutant and WT cx43 are essentially the same (see comment reviewer 2). We also performed experiments using Gap27 which rescued the bradycardia phenotype. Finally, we added Western blot-based data do support IF data on Cx43 protein levels (Figures 3, 5).

*Minor comments:*

*Lines 61-65 should perhaps be re-written to improve clarity.*

This section has been rewritten (p. 3).

*Line 75: This sentence might need re-writing to improve precision.*

The sentence has been removed (p. 4).

*Line 136: Half-life*

The spelling has been corrected (p. 8).

*Figure 7C: Missing errors bars*

Error bars have been added. Note they are extremely short. Exact numbers including standard deviations are now given for all data in the Results sections.

#### **Reviewer #2 (Remarks to the Author):**

*This is an interesting study by Hyland et al that reports the phenotypic characterization of some cardiovascular defects when a region of the Cx43 c-terminus is deleted. The description of the cardiac and vascular defects in the mutant zebrafish line is straightforward and clear.*

We thank the reviewer for this positive feedback

*Less supported is the genetic characterization of the zebrafish line, or the association with impaired endocytosis. Given that there is an increase in Cx43 mRNA in the mutant fish line (Fig. 8) which matches the reported increase in protein levels, the findings may quantitatively be due more to transcriptional and translational regulation than post-translational events.*

We are pleased that our re-performed qRT-PCR analyses as described above has eliminated this valid concern. We hope the reviewers concern, after reading our revised manuscript, has been eased.

*1. It is not clear what is meant by the zebrafish "transgenic line". The methods describe a targeted deletion of the Cx43 c-terminus, yet no sequencing is provided to confirm deletion. Please provide the original sequencing data to confirm deletion and also the strategies employed to minimize off target effects such as backcrossing.*

(Please also see response to Reviewer 1) We now describe in detail how the mutant was generated, and all requested additional data are now shown (Supplemental Figures 1, 2).

*2. For the zebrafish models, please provide biochemical support of the immunohistochemistry data, confirming altered protein levels.*



Biochemical support (Western blots) has been added (Figure 2C).

*3. Why is mutant Cx43 mRNA increased 1.5 fold (Figure 8)?*

Please see our responses above and the revised manuscript. It is not.

*4. A 50% increase in Cx43 mRNA could very likely result in a 50% increase in mutant Cx43 protein levels. Total Cx43 protein levels also increased 50% compared to wildtype fish (Figures 2 and 3). Thus increased Cx43 protein levels would simply result from increases in transcription and translation, and not impaired endocytosis. Outside of the author's prior publications, what are the data in the current models that support that if endocytosis is impaired it will lead to an increase in Cx43 levels?*

We are pleased that our re-performed qRT-PCR analyses as described above has eliminated this valid concern. We hope the reviewers concern, after reading our revised manuscript, has been eased.

In addition, we show that mutant Cx43 protein half-life is extended significantly, more Cx43 protein and gap junctions are present in the plasma membranes in model culture cells and mutant embryos, and that dye transfer (GJIC) is significantly increased, all data that support the concept that when endocytosis is impaired, it will lead to an increase in Cx43 levels

*5. What are the endogenous levels of zebrafish atrial and ventricular Cx43 relative to other connexin proteins? It is highly unusual to see significant atrial expression of Cx43, approaching that of ventricular expression.*

By normalizing both protein levels to 1 we unintentionally gave the impression, Cx43 expression levels in both heart chambers is equal. We now carefully describe expression levels and have modified the representative graph (p. 12, Fig. 5B, C).

*6. Patch clamping pairs of cells containing WT and mutant Cx43 will help establish and quantify increased intercellular conductance relative to increased plaque density.*

We agree, and we have initiated collaborative electrophysiological measurements. However, due to a number of unforeseen difficulties, we were not able to generate meaningful data yet. We plan on providing a detailed electrophysiological characterization of the mutant in a later manuscript.

*7. The authors previously used Gap27 to inhibit gap junction formation and GJIC, and reverse mutant induced zebrafish phenotypes (Bhattacharya et al, 2020). A similar cardiovascular rescue in this study would considerably strengthen the results.*

We agree, and we are pleased to report that the bradycardia phenotype was rescued by Gap 27 injection, while the heart morphology phenotype was not.

RE: Manuscript #E20-12-0797R

TITLE: "Impaired Cx43 gap junction endocytosis causes morphological and functional defects in zebrafish"

Dear Dr. Falk,

Thanks for submitting your revised manuscript. The crucial qRT-PCR data, the GAP27 experiment, and the additional information on your CRISPR allele seem to address the most significant comments from the Reviewers. As a result, I am pleased to say that I think your paper is now acceptable for publication in *Molecular Biology of the Cell*.

Please address the following small issues in your final manuscript:

Line 125: "Potential effects on cx40.8, a cx43-like gene in zebrafish are discussed." There seems to be a word or phrase missing. "discussed below"? "dealt with in the Discussion section"?

Lines 364-375: There may be some inconsistency in capitalization of "Cx43". Please check carefully.

Line 393: "heterozygote mutations" should be "heterozygous for mutations"

Line 442: "cell guiding" should be "cell guidance"

Line 994-995: "Note, that the heart rate of embryos injected with Gap27 was restored closely to WT levels" should be ""Note, that the heart rate of embryos injected with Gap27 was restored to close to WT levels"

Then I think your manuscript should be ready for publication.

Many thanks for submitting your work to MBoC!

Best regards,  
Jeff Hardin  
Monitoring Editor

-----  
Dear Prof. Falk,

The review of your manuscript, referenced above, is now complete. The Monitoring Editor has decided that your manuscript requires minor revisions before it can be published in *Molecular Biology of the Cell*, as described in the Monitoring Editor's decision letter above and the reviewer comments (if any) below.

A reminder: Please do not contact the Monitoring Editor directly regarding your manuscript. If you have any questions regarding the review process or the decision, please contact the MBoC Editorial Office ([mboc@ascb.org](mailto:mboc@ascb.org)).

When submitting your revision include a rebuttal letter that details, point-by-point, how the Monitoring Editor's and reviewers' comments have been addressed. (The file type for this letter must be "rebuttal letter"; do not include your response to the Monitoring Editor and reviewers in a "cover letter.") Please bear in mind that your rebuttal letter will be published with your paper if it is accepted, unless you have opted out of publishing the review history.

Authors are allowed 180 days to submit a revision. If this time period is inadequate, please contact us immediately at [mboc@ascb.org](mailto:mboc@ascb.org).

In preparing your revised manuscript, please follow the instruction in the Information for Authors ([www.molbiolcell.org/info-for-authors](http://www.molbiolcell.org/info-for-authors)). In particular, to prepare for the possible acceptance of your revised manuscript, submit final, publication-quality figures with your revision as described.

To submit the rebuttal letter, revised version, and figures, please use this link (please enable cookies, or cut and paste URL): [Link Not Available](#)

Authors of Articles and Brief Communications whose manuscripts have returned for minor revision ("revise only") are encouraged to create a short video abstract to accompany their article when it is published. These video abstracts, known as Science Sketches, are up to 2 minutes long and will be published on YouTube and then embedded in the article abstract. Science Sketch Editors on the MBoC Editorial Board will provide guidance as you prepare your video. Information about how to prepare and submit a video abstract is available at [www.molbiolcell.org/science-sketches](http://www.molbiolcell.org/science-sketches). Please contact [mboc@ascb.org](mailto:mboc@ascb.org) if you are

interested in creating a Science Sketch.

Thank you for submitting your manuscript to Molecular Biology of the Cell. Please do not hesitate to contact this office if you have any questions.

Sincerely,

Eric Baker  
Journal Production Manager  
MBoC Editorial Office  
mbc@ascb.org

-----



## Point-by-point response to Manuscript #E20-12-0797:

We thank the reviewers and the Monitoring Editor for their verbatim criticism and the time they invested to carefully evaluate our manuscript. We are pleased, that both reviewers found our study to be important and interesting. We have addressed all concerns as detailed below. In response to the critique, four main changes have been introduced to the revised manuscript:

(1) In response to the critique, we repeated qRT-PCR analyses, this time by pooling 15 embryos per biological replicate instead of using just one embryo as done in the previous analyses. We are aware that the previous analysis was not optimal as phenotype severity is quite heterogeneous and thus individual embryos may not represent the average, however at that time, we did not have enough homozygote mutant embryos to perform a large enough study. Importantly, this modification now shows that mRNA levels of *cx43* in the mutant are not increased, and indeed are essentially identical to WT. Thus, the observed increase in Cx43 protein and gap junction levels is not due to upregulated *cx43* expression, but impaired gap junction turnover. Indeed, with this new data fueling stronger confidence, we now express clearer that impaired gap junction turnover causes all sorts of problems, as demonstrated in detail here for vasculature morphology and function.

(2) We also performed experiments using the gap junction blocker, Gap27 as has been done earlier (Bhattacharya et al., 2020) and suggested by reviewer 2; and indeed we could rescue the bradycardia (abnormally slow heartbeat rate), but not the heart malformation phenotype, suggesting that both, increased GJIC resulting from overall increased gap junction size and number, as well as cell migration issues, both caused by disturbed endocytosis significantly contribute to the observed phenotypes.

(3) As suggested by reviewer 2, we added Western blot-based Cx43 protein expression data in addition to the immunofluorescence data shown previously (revised Figure 2).

(4) Finally, we present in much more detail how the *cx43<sup>h10</sup>* mutant zebrafish line was generated, what we did to prevent off-target side effects, and show verification of the mutant via DNA sequencing data as suggested by Reviewer 2 (Supplemental Table 1, and Supplemental Figures 1, 2).

Edits have been performed throughout the manuscript and major changes, including in response to reviewer critique, have been **highlighted in yellow**. Our substantial additions and revisions certainly have generated a much-improved manuscript that much better supports our important novel finding that regulated gap junction turnover is essential for gap junction function; and we hope our revised manuscript is now suitable for publication in *MBoC*. Please see detailed responses below:

### Reviewer #1 (Remarks to the Author):

*The authors provide results on the disruptive effects of a mutant Cx43 (Cx43 $\Delta$ 256-289) on gap junction endocytosis and communication in cultured cells and in a zebrafish model in vivo - particularly on cardiac GJ function and morphology. The strengths of the article include its novel insights into the process of Cx43 endocytosis using these in vitro and in vivo models, as well [as] novel information on how Cx43-associated cardiovascular abnormalities may occur. Most, if not all, of the observations made were reasonably supported by experimentation and quantified data. Many effect sizes did not appear to be large, but there was sufficient replication to achieve significance in most cases. The paper is clearly written, and the study appears to [be] well performed.*

We thank the reviewer for this positive feedback.

*Specific comments:*

*No control was used to account for the potential off-target effects of the Cx43 (256-289) deletion process. The WT groups may not serve as adequate controls in this respect. The authors should note this and other limitations of approach and on interpretation in the discussion.*

We now describe in much more detail how the  $\Delta$ 256-289 deletion in zebrafish was generated using CRISPR/Cas9 gene editing technology and describe in detail how gRNAs were designed, and their specificity ensured (Materials and Methods, p. 23/24; Results, p. 6ff, Figure 1, and Supplemental Figures 1, 2). We are aware of potential off-target effects of this technology, however, (1) we obtained the “expected” effects (vasculature and other organs where Cx43 function is known to be important), (2) gRNAs are predicted to bind in addition to *cx43* only to *cx40.8*, and not to any other sites, even when 3 mismatches are allowed; (3) we used improved VP12 Cas9; and backcrossing to eliminate mosaic mutagenesis and to generate homozygotes should have eliminated other potential off-targets. This is now discussed in detail on p. 6 and 17.

*The differential/inconsistent effects on vessel diameter in the fin vs embryo should be discussed/addressed further.*

We do not see an inconsistency in vessel diameter between embryos and adult fins, as angiogenic vessels, we analyzed in embryos are not yet fully differentiated into veins and arteries. Larger vessel diameters were observed in both, embryos, and adults. To clarify, this section has been rewritten and additional detailed information provided (p. 13).

*The method for measurement of edema in Figure 5C appears to be missing.*

The missing method has been added (p. 30).

*Mechanistic insight into the link between impaired Cx43 endocytosis and cardiovascular deficits was largely restricted to the discussion section. It might have been useful to further explore the mechanism with further experiments in the results section. Are there additional data lately generated by the authors that might unify the mechanistic basis of their story?*

Links between impaired Cx43 endocytosis and cardiovascular and other defects have been added throughout the manuscript. Most importantly, our improved qRT-PCR

analysis now shows that mRNA levels of mutant and WT cx43 are essentially the same (see comment reviewer 2). We also performed experiments using Gap27 which rescued the bradycardia phenotype. Finally, we added Western blot-based data do support IF data on Cx43 protein levels (Figures 3, 5).

*Minor comments:*

*Lines 61-65 should perhaps be re-written to improve clarity.*

This section has been rewritten (p. 3).

*Line 75: This sentence might need re-writing to improve precision.*

The sentence has been removed (p. 4).

*Line 136: Half-life*

The spelling has been corrected (p. 8).

*Figure 7C: Missing errors bars*

Error bars have been added. Note they are extremely short. Exact numbers including standard deviations are now given for all data in the Results sections.

**Reviewer #2 (Remarks to the Author):**

*This is an interesting study by Hyland et al that reports the phenotypic characterization of some cardiovascular defects when a region of the Cx43 c-terminus is deleted. The description of the cardiac and vascular defects in the mutant zebrafish line is straightforward and clear.*

We thank the reviewer for this positive feedback

*Less supported is the genetic characterization of the zebrafish line, or the association with impaired endocytosis. Given that there is an increase in Cx43 mRNA in the mutant fish line (Fig. 8) which matches the reported increase in protein levels, the findings may quantitatively be due more to transcriptional and translational regulation than post-translational events.*

We are pleased that our re-performed qRT-PCR analyses as described above has eliminated this valid concern. We hope the reviewers concern, after reading our revised manuscript, has been eased.

*1. It is not clear what is meant by the zebrafish "transgenic line". The methods describe a targeted deletion of the Cx43 c-terminus, yet no sequencing is provided to confirm deletion. Please provide the original sequencing data to confirm deletion and also the strategies employed to minimize off target effects such as backcrossing.*

(Please also see response to Reviewer 1) We now describe in detail how the mutant was generated, and all requested additional data are now shown (Supplemental Figures 1, 2).

*2. For the zebrafish models, please provide biochemical support of the immunohistochemistry data, confirming altered protein levels.*

Biochemical support (Western blots) has been added (Figure 2C).

*3. Why is mutant Cx43 mRNA increased 1.5 fold (Figure 8)?*

Please see our responses above and the revised manuscript. It is not.

*4. A 50% increase in Cx43 mRNA could very likely result in a 50% increase in mutant Cx43 protein levels. Total Cx43 protein levels also increased 50% compared to wildtype fish (Figures 2 and 3). Thus increased Cx43 protein levels would simply result from increases in transcription and translation, and not impaired endocytosis. Outside of the author's prior publications, what are the data in the current models that support that if endocytosis is impaired it will lead to an increase in Cx43 levels?*

We are pleased that our re-performed qRT-PCR analyses as described above has eliminated this valid concern. We hope the reviewers concern, after reading our revised manuscript, has been eased.

In addition, we show that mutant Cx43 protein half-life is extended significantly, more Cx43 protein and gap junctions are present in the plasma membranes in model culture cells and mutant embryos, and that dye transfer (GJIC) is significantly increased, all data that support the concept that when endocytosis is impaired, it will lead to an increase in Cx43 levels

*5. What are the endogenous levels of zebrafish atrial and ventricular Cx43 relative to other connexin proteins? It is highly unusual to see significant atrial expression of Cx43, approaching that of ventricular expression.*

By normalizing both protein levels to 1 we unintentionally gave the impression, Cx43 expression levels in both heart chambers is equal. We now carefully describe expression levels and have modified the representative graph (p. 12, Fig. 5B, C).

*6. Patch clamping pairs of cells containing WT and mutant Cx43 will help establish and quantify increased intercellular conductance relative to increased plaque density.*

We agree, and we have initiated collaborative electrophysiological measurements. However, due to a number of unforeseen difficulties, we were not able to generate meaningful data yet. We plan on providing a detailed electrophysiological characterization of the mutant in a later manuscript.

*7. The authors previously used Gap27 to inhibit gap junction formation and GJIC, and reverse mutant induced zebrafish phenotypes (Bhattacharya et al, 2020). A similar cardiovascular rescue in this study would considerably strengthen the results.*

We agree, and we are pleased to report that the bradycardia phenotype was rescued by Gap 27 injection, while the heart morphology phenotype was not.



RE: Manuscript #E20-12-0797RR

TITLE: "Impaired Cx43 gap junction endocytosis causes morphological and functional defects in zebrafish"

Dear Dr. Falk,

Many thanks for returning your re-revised manuscript, which is now ready for publication in Molecular Biology of the Cell.

Thanks again for choosing MBoC.

Best regards,  
Jeff Hardin  
Monitoring Editor  
Molecular Biology of the Cell

-----  
Dear Prof. Falk:

Congratulations on the acceptance of your manuscript.

A PDF of your manuscript will be published on MBoC in Press, an early release version of the journal, within 10 days. The date your manuscript appears at [www.molbiolcell.org/toc/mboc/0/0](http://www.molbiolcell.org/toc/mboc/0/0) is the official publication date. Your manuscript will also be scheduled for publication in the next available issue of MBoC.

Within approximately four weeks you will receive a PDF page proof of your article.

Would you like to see an image related to your accepted manuscript on the cover of MBoC? Please contact the MBoC Editorial Office at [mboc@ascb.org](mailto:mboc@ascb.org) to learn how to submit an image.

Authors of Articles and Brief Communications are encouraged to create a short video abstract to accompany their article when it is published. These video abstracts, known as Science Sketches, are up to 2 minutes long and will be published on YouTube and then embedded in the article abstract. Science Sketch Editors on the MBoC Editorial Board will provide guidance as you prepare your video. Information about how to prepare and submit a video abstract is available at [www.molbiolcell.org/science-sketches](http://www.molbiolcell.org/science-sketches). Please contact [mboc@ascb.org](mailto:mboc@ascb.org) if you are interested in creating a Science Sketch.

We are pleased that you chose to publish your work in MBoC.

Sincerely,

Eric Baker  
Journal Production Manager  
MBoC Editorial Office  
[mbc@ascb.org](mailto:mbc@ascb.org)

-----
